# Supplementary material for: Prediction of B-cell epitopes using evolutionary information and propensity scales
Source: PubMed Central journal article supplement (PMC3549808; doi:10.1186/1471-2105-14-s2-s10), 2013-01-21
Supplement: 1471-2105-14-S2-S10-S3.pdf [file 1471-2105-14-S2-S10-S3.pdf]

0000000000000001111111111111111100111111111111111111111111111111111100  
0000000000000000000000000000000011111111111111110000000000000000000000  
0000000000000000000000000000000000000000000000000000000000000000

> P06781 RHO2\_YEAST

MSEKAVRRKLVIIIGDGACGKTSLLYVFTLGKFPQYHPTVVFENYVTDCRVDGIKVSLLTLDWTAGQE  
EYERLRPFSYSKADIILIGFAVDNFESLINARTKWADEALRYCPDAPIVLVGLKKDLRQEAHFKEN  
ATDEMVPIDAKQVARAIGAKKYMESALTGEGVDDVFEVATRTSLLMKKEPGANCCIIIL  
0000000000000000000000000000000000000000000000000000000000000000  
0000000000000000000000000000000000000000000000000000000000000000  
0000000000000000000000000000000000000000000000000000000000000000

> P02662 CAS1\_BOVIN

MKLLILTCLVAVALARPKHPIKHQGLPQEVNENLLRFFVAPFPEVFGKEKVNELSKDIGSESTED  
QAMEDIKQMEAESISSEEIVPNSVEQKHIQKEDVPSERYLGYLEQLLRLKKYKVPQLEIVPNSAE  
ERLHSMKEGIHAQQKEPMIGVNQELAYFYPELFRQFYQLDAYPSGAWYYVPLGTQYTDAPSFSDIP  
NPIGSENSEKTTMPLW  
0000000000000000000000000000000000000000000000000000000000000000  
1111111111111111000000000000000000000000000000000000000000000000  
0000000111111111100000011111111110000000000000000000000000000000  
000001111111111111

> P13811 ELBH\_ECOLI

MNKVKFYVLFALLSSLCAHGAPQSITELCSEYHNTQIYTINDKILSYTESMAGKREMVIITFKSG  
ATFQVEVPGSQHIDSQKKAIERMKDTRLRITYLTETKIDKLCVWNNKTPNSIAAISMEN  
0000000000000000000000000000000000000000000000000000000000000000  
1111100000000000000000000000000000000000000000000000000000000000  
1111111111111111111111111111111111111111111111111111111111111111

> P04156 PRIO\_HUMAN

MANLGCWMLVLFVATWSDLGLCKKRPKPGGWNTGGSRYPGQSPGGNRYPPQGGGGWGQPHGGGWG  
QPHGGGWGQPHGGGWGQPHGGGWGQGGGTHSQWNKPSKPKTNMKHMAGAAAAGAVVGGGLGGYMLGS  
AMSRPIIHFGSDYEDRYRENMHRYPNQVYRPMDEYSNQNNFVHDCVNITIKQHTVTTTTTKGENF  
TETDVKMMERVVEQMCITQYERESQAYYQRGSSMVLFSPPVILLISFLIFLIVG  
0000000000000000000000000000000000000000000000000000000000000000  
0000000000000000000000000000000000000000000000000000000000000000  
1111111111111111111111111111111111111111111111111111111111111111  
1111111111111111111111111111111111111111111111111111111111111111  
1111111111111111111111111111111111111111111111111111111111111111  
1111111111111111111111111111111111111111111111111111111111111111

> P87020 PRA1\_CANAL

MNYLLFCLFFAFSVAAPVTVTRFVNASPTGYDWRADWVKGFIDSSCNATQYNQLSTGLQEAQLLA  
EHARDHTLRFSGSKSPFFRKYFGNDTASAEVVGHFENVVGADKSSILFLCDDLDDKCKNDGWAGYWR  
GSNHSDQTIICDLSFVTRRYLSQLCSGGYTVSKSKTNIFWAGDLLHRFWHLKLSIGQLVIEHYADTY  
EEVLELAQENSTYAVRNSNSLIYYALDVYAYDVTIPGEGCNGDGTSYKKSDFSSFFEDSDSGSDSGA



> Q08137 OSPC2\_BORBU

MKKNTLSAILMTLFLFISCNNSGKGGDSASTNPADESAGPNLTEISKKITDSNAFVLAVKEVETL  
VLSIDELAKKAIGQKIDNNNGLAALNNQNGSLLAGAYAI STLITEKLSKLNLEELKTEIAKAKKC  
SEEF TNKLKSGHADLGKQDATDDHAKAA I LKTHATTDKGAK EFKDLFESVEGLL KAAQVALTNSVK  
ELTSPVVAESP KKP

0000000000000000000000000000000000000000000000000000000000000000  
0000000000000000000000000000000000000000000000000000000000000000  
0000000000000000000000000000000000000000000000000000000000000000  
000011111111111

> Q39967 ALL5\_HEVBR

ASVEVES AATALPKNETPEVTKAEETKTEEPAAPPASEQETADATPEKEEPTAAPAEPEAPAPETE  
KAEVEKIEKTEEPAPEADQTTPEEKPAEPEPVAE EEPKHETKETETEAPAAPAEGEKPAEEKPI  
TEAAETATTEVPVEKTEE

000000000000011111111011111111111101111111111111111111111111111111110000000000  
00000011111111111000011111111111100000000000000000000000000000000000000011  
1111111111100000000

> O82803 SRPP\_HEVBR

MAEEVEEERLKYLD FVRAAGVYAVDSFSTLYLYAKDISGPLKPGVDTIENVVKT VVTPVYYI PLEA  
VKFVDKTV DVS VTS LDG VVPV I KQVSAQTY SVAQDAPRIVLDVASSVFNTGVQEGAKALYANLEP  
KAEQYAVITWRALNKLPLVPQVANVVVPTAVYFSEKYNDVVRGTTEQGYRVSSYLPLLPT EKITKV  
FGDEAS

0111111111111111111111100000000000111111111110011111111111100000000011111111  
11111000000000000000111111111110000000011111111111000001111111111100000  
00000000000000000000000000001111111111100000000000000000000000000000  
000000

> Q9ZMZ4 UREA\_HELPJ

MKLTPKELDKLMLHYAGELARKRKEKGIKLN YVEAVALISAHIMEEARAGKKTAAELMQEGRTLLK  
PDDVMDGVASMIHEVGIEAMFPDGT KLVT VHTPIEANGKLVPGELFLKNEDITINEGKKAVSVKVK  
NVGDRPVQIGSHFHF FEVNRCLDFDREKTFGKRLDIASGTAVRFEPGEEKSVELIDIGGNRRIFGF  
NALVDRQADNESK KIALHRAKERGFHGAKSDDNYVKTIKE

1111111111110000000000000000000000000000000000000000000000000000000000000000  
0000000000000000000000111111111111111110000000000000000000111111111111  
11100000000000000000000000000000000000000000000000000000000000000000000011111111111100  
0000000000000000000000000000000000000000000000000000000000000000000000000000000000000

> P03126 VE6\_HP V16

MHQKRTAMFQDPQERPRKLPQLCTELQTTIHDIILECVYCKQQLLRREVYDFAFRDLCIVYRDGNP  
YAVCDKCLKFYSKISEYRHYCYSLYGTTLEQQYNKPLCDLLIRCINCQKPLCPEEKQRHLDKQRF  
HNIRGRWTGRCMSSCRSSRTRRETQL









GGWSSKPRKGMGTNLSVNPPLGFFPDHQLDPVFGANSNNPDWDFNPIKDHWPAANQVGVGAFGPGF  
TPPHGGVLGWSPQAQGMLTPVSTIPPPASANRQSGRQPTPI SPPLRDSHPQAMQWNSTAFHQALQD  
PRVRGLYFPAGGSSSGTVNPAPNIASHISSISARTGDPVTNMENTSGFLGPLPVLQAGFFLLTRI  
LTIPQSLDSWWTSLNFLGGSPVCLGQNSRSPTSNSHSPTSCPPICPGYRWMCLRRFIIFLFI LLLCL  
IFLLVLLDYQGMLPVCPLILGSTTTSTGPCKTCTTPAQGNSMFPSCCCTKPTDGNCTCIPIPSSWA  
FAKYLWEWASVRFSWLSLLVPFVQWFVGLSPTVWLSAIWMMWYWGPSLYSIVSSFIPLLPIFFCLW  
VYI

0000000000000000000000000000000000000000000000000000000000000000  
0000000000000000000000000000000000000000000000000000000000000000  
0000000000000000000000000000000000000000000000000000000000000000  
0000000000000000000000000000000000000000000000000000000000000000  
0000000000000000000000000000000000000000000000000000000000000000  
0000000000000000000000000000000000000000000000000000000000000000  
000

> Q40240 MPA5A\_LOLPR

MAVQKYTVLFLRRGPRGGPGRSYAADAGYTPAAAATPATPAATPAGGWREGDDRRAEAAGGRQRL  
ASRQPWPPLPTPLRRTSSRSPSPSPRASSPTSAAKAPGLIPKLDTAYDVAYKAAEAHPRGQV  
RRLRHCPHRSLRVIAGALEVHAVKPATEEVLAAKIPTGELQIVDKIDA AFKIAATAANAAPTNDKF  
TVFESAFNKALNECTGGAMRPTSSSPSRPRSSRPTPPPSPAPEVKYAVFEAALTKAITAMTQAQ  
KAGKPAAAAATAAATVATAAATAAAVLPPPLL VQSLISLLIYY

0000000000000000000000000000000000000000000000000000000000000000  
0000000000000000000000000000000000000000000000000000000000000000  
0000000000000000000000000000000000000000000000000000000000000000  
0001111111111110000000000000000000000000000000000000000000000000  
1111110000000000000000000000000000000000000000000000000000000000  
000

> P04405 GLYG2\_SOYBN

MAKLVLSLCFLLFSGCFALREQAQQNECQIQKLNALKPDNRIESEGGFIETWNPNNKPFQCAGVAL  
SRCTLNRNALRRPSYTNQGPQEIYIQQNGIFGMI FPGCPSTYQEPQESQQRGRSQRPD RHQKVHR  
FREGDLIAVPTGVAWWMYNNEDTPVVAVSII DTNSLENQLDQMPRRFYLAGNQEQEFLKYQQQQQG  
GSQSQKQKQEEENEENEGSNILSGFAPEFLKEAFVNMQIVRNLQGENEEEDSGAIVTVKGGLRV TAP  
AMRKPPQEEEDDDDEEQPQC VETDKGCQRQSKRSRNGIDETICTMRLRQNIQNSSPDIYNPQAGS  
ITTATSLDFPALWLLKLSAQYGLRKNAMFVPHYTLNANSIIYALNGRALVQVNCNGERVF DGEL  
QEGGV LIVPQNFVAVAKSQSDNF EYVSFKTNDRPSIGNLAGANSLLNALPEEVIQHTFNLKSQQAR  
QVKNNNPFSFLVPPQESQRRAVA

0011111111111111000000000000000000000000000000000000000000000000  
0000000000000000000000000000000000000000000000000000000000000000  
0000000000000000000000000000000000000000000000000000000000000000  
1111110000000000000000000000000000000000000000000000000000000000



GARAALWECGCATLGASFQYAQSKPKVEELNVLCNASEFTINKPKGYVGAEFPLNITAGTEAATGT  
KDASIDYHEWQASLALSRYRLNMFTPYIGVKWSRVSFADDTIRIAQPKLAEAILDVTTLNRTTAGKG  
SVVSAGTDNELADTMQIVSLQLNKMKSRSKSCGIAVGTITVDADKYAVTVEARLIDERAAHVNAQFR  
F

0000000000000000000000000000000000000000000000000000000000000000  
0000000000000000000000000000000000000000000000000000000000000000  
0000000000000000000000000000000000000000000000000000000000000000  
0000000000000000000000000000000000000000000000000000000000000000  
0000000000000000000000000000000000000000000000000000000000000000  
0000000000000000000000000000000000000000000000000000000000000000  
0

> P21793 PGS2\_BOVIN

MKATIIIFLLVAQVSWAGPFQOKGLDFDFMLEDEASGIGPEEHFPEVPEIEPMGPVPCPFRQCCHLRVV  
QCSDLGLEKVPKDLPPDTALLDLQNNKITEIKDGDGFKNLKNLHTLILINNKISKISPGAFAPLVKL  
ERLYLSKNQLKELPEKMPKTLQELRVHENEITKVRKSVFNGLNQMIIVVELGTNPLKSSGIENGAFAQ  
GMKKLSYIRIADTNITTIPQGLPPSLTELHLDGNKITKVDAASLKGLNNLAKLGLSFNSISAVDNG  
SLANTPHLRELHLNKNLKVPGGLADHKYIQVVYLHNNNISAIKSNDFCPPGYNTKKASYSYSGVSL  
FSNPVQYWEIQPSTFRCVYVRAAVQLGNYK

0000000000000000000000000000000000000000000000000000000000000000  
0000000000000000000000000000000000000000000000000000000000000000  
0000000000000000000000000000000000000000000000000000000000000000  
0000000000000000000000000000000000000000000000000000000000000000  
0011111111111111000000000000000000000000000000000000000000000000  
0000000000000000000000000000000000000000000000000000000000000000

> P15310 PHLC1\_CLOPE

MKRKICKALICATLATSLSWAGASTKVYAWDGKIDGTGTHAMIVTQGVSIENDLSKNEPESVRKNL  
EILKENMHELQLGSTYPDYDKNAYDLYQDHFWDPTDNNFSKDNSWYLAYSIPDTGESQIRKFSAL  
ARYEWQRGNKQATFYLGEMHYFGDIDTPYHPANVTAVDSAGHVKFETFAEERKEQYKINTAGCK  
TNEDFYADILKNKDFNAWSKEYARGFAKTGKSIYYSHASMSHSWDDWDYAAKVTLAN SQGTAGYI  
YRFLHDVSEGN DPSVGKNVKELVAYISTSGEKDAGTDDYMYFGIKTKDGKTQEWEMDNPGNDFMTG  
SKD TYTFKLK DENL KIDDIQNMWIRKRKYTAFPDAYK PENIKI IANGKV VVDK DINEWISGNSTYN  
IK

0000000000000000000000000000000000000000000000000000000000000000  
0000001111110000000000000000000000000000000000000000000000000000  
0000000000000000000000000000000000000000000000000000000000000000  
0000011111110000000000000000000000000000000000000000000000000000  
1111100000000000000000000000000000000000000000000000000000000000  
0000000000000000000000000000000000000000000000000000000000000000











> Q8X7B6 TRPB\_ECO57

TLLNPFYFGFEGGMYVPQILMPALRQLEEFVSAQKDPEFQAQFNDLLKQNYAGRPTALTKCQNITA  
GTNTTLYLKREDLLHGGAHKTNQVLGQALLAKRMGKTE I IAETGAGQHGVASALASALLGLKCRIY  
MGAKDVERQSPNVFRMLMGAEV I PVHSGSATLKDACNEALRDWSGSYETAHYMLGTAAGPHPYPT  
IVREFQRMIGEETKAQILEREGR LPDAVIACVGGGSNAIGMFADF INETNVGLIGVEPGGHGIETG  
EHGAPLKHGRVGIYFGMKAPMMQTEDGQIEESYSISAGLDFPSVGPQHAYLNSTGRADYVSI TDDE  
ALEAFKTLCLHEGI I PALESSHALAHALKMMRENPEKEQLLVNLSGRGDKDI FTVHDILKARGEI  
00000000000000000000000000000000000000000000000000000000000000000000  
00000000000000000000000000000000000000000000000000000000000000000000  
00000000000000000000000000000000000000000000000000000000000000000000  
00000000000000000000000000000000000000000000000000000000000000000000  
00000111111111111111000000000000000000000000000000000000000000000000  
00000000000000000000000000000000000000000000000000000000000000000000

> P42375 CH60\_PORGI

MAKEIKFDMESRDLLKKGVDALANAVKVTLGPKGRNVILSKTYGAPHITKDGVSVAKEIELECPFE  
NMGALVKEVASKTND DAGDGT TATILAQSI IGVGLKNVTAGANPMDLKR GIDKAVKAVVTHIAG  
MAKEVGDDFQKIEHVAKISANGDENIGSLIAEAMRKVKKEGVITVEEAKGTDTTVEVVEGMQFDRG  
YISPYFVTNTDKMEVQ MENPFILYDKKISVLKEMLP ILEQTVQTKPLLI IAEDIDSEALATLVV  
NRLRGLSLKICAVKAPGFGDRRKAMLEDIA ILTGGTVISEETGLKLENATMDMLGTAEKVTVDKDNT  
TIVNGAGNKEG IASRITQ IKAQ IENTTS DYDREKLQERLAKLAGGVAVLYVGAASEVEMKEKKDRV  
EDALSATRAAIEEGTVPGGGTAYIRAI AALEGLKGENEDET TGIEIVKRAIEEPLRQIVANAGKEG  
AVVVQKVKEGKDDFGYNARTDVFENLYTTGVIDPAKVTRVALENAASIAGMFLTTECVIADKKEDN  
PAAPAMPGGMGMGMGM

00000000001111111111000000000000000000000000000000000000000000000000  
00000111111111110000000000000000000000000000000000000000000000000000  
000000001111111111000000000111111111111111100000000000000111111  
111100000000000000000111111111100000000000000000000000000000111  
1111110000001111111111110000000000000000000000000000000000000000  
00001111111111111000000000000011111111111111110000000000000000  
00000000000000000000011111111100000011111111110000000000000000  
0000000000000000000000000111111111000011111111110000000000000000  
0000000000000000

> Q00663 CARP\_CANTR

MATIFLFTKNVFIALAFALFAQGLTIPDGIEKRTDKVVSLDFTVIRKPFNATAHRLIQKRSDVPTT  
LINEGPSYAADI VVGSNQQKQTVVIDTGSSDLWVVDTDAECQVTYSGQTNNFCKQEGTFDPSSSSS  
AQNLNQDFSIEYGDLTSSQGSFYKDTVGFGGISIKNQFADVTTTSVDQGIMGIGFTA VEAGYNLY  
SNVPVTLKKQGI INKNAYS CDLNSEDA STGKI I FGGVDNAKYTGTLTALPVTSSVELRVHLGSINF  
DGTSVSTNADVVLDSGTTITYFSQSTADKFARIVGATWDSRNEIYRLPSCDLSGDAVVNFDQGVKI







DLGNGLKAIWQVEQKASIAGTDSGWGNRQSFIFGLKGGFGKLRVGRRLNSVLKDTGDINPWDSKSDYL  
GVN KIAEPEARLISVRYDSPEFAGLSGSVQYALNDNAGRHNSESYHAGFNKNGGFFVQYGGAYKR  
HHQVQEGLNIEKYQIHRLVSGYDNDALYASVAVQQQDAKLT DASNSHNSQTEVAATLAYRFGNVTP  
RVSYAHGFKGLVDDADIGNEYDQVVVGAEYDFSKRTSALVSAGWLQEGKGENKFVATAGGVGLRHK  
F

000000000000000000000000000000000111111111111111111000000000000000  
0111111111111111111111111111111111000000000000000000000000000000  
000000000000001111111111111111111100000011111111111100000000000000  
0000000000000000000000000000000000000000000000000000000000000001111111111  
11111111111111110000000000000000000000000000000000000000000000000000000000  
0

> P10332 OM1E\_CHLPS

MKKLLKSALLFAATGSALSLOALPVGNPAPESLLIDGTMWEGASGDPCDPCATWCDAISIRAGYYG  
DYVFDRLVKVDVNKTFSGMAATPTQATGNASNTNQPEANRPNIAYGRHMQDAEWF SNA AFLALNI  
WDRFDIFCTLGASNGYFKSSAAFNLVGLIGFSATSSTSTELPMQLPNVGI TQGVVEFYTDTSFSW  
SVGARGALWECGCATLGAEFQYAQSNPKIEVLNVTSSPAQFVIHKPRGYKGASSNFPLPITAGTTE  
ATDTKSATIKYHEWQVGLALSRLNMLVPYIGVNWSRATFDADTIRIAQPKLKSEILNITWNP SL  
LGSTTTLPNNGGKDVLS DVLQIASIQINKMKS RKACGVAVGATLIDADKWSITGEARLINERAAHM  
NAQFRF

0000000000000000000000000000000000000000000000000000000000000000  
0000000000000000000000000000000000000000000000000000000000000000  
0000000000000000000000000000000000000000000000000000000000000000  
0000000000000000000000000000000000000000000000000000000000000000  
0000000000000000000000000000000000000000000000000000000000000000  
0000000000000000000000000000000000000000000000000000000000000000  
000000000000000001111111111110000000000000000000000000000000000000  
000000

> P23114 OM1N\_CHLTR

MKKLLKSVLVFAALSSASSLQALPVGNPAPESLMIDGILWEGFGGDPCDPCCTTWCD AISMRVGYG  
DFVFDRLVKTDVNKEFQMGAEPTSDTAGLSNDPTTNVARPNPAYGKHMQDAEMFTNAAYMALNIW  
DRFDVFC TLGATTGYLKGNSASFNLVGLFGTKTQSTNFNTAKLPNTALNQAVVELYTDTTFAWSV  
GARAALWECGCATLGASFQYAQSKPKVEELNVLCDASEFTINKPKGYVGAEFPLDITAGTEAATGT  
KDASIDYHEWQASLALSRLNMFTPYIGVKWSRVSFADTIRIAQPKLAEAVLDVTTLNPTIAGKG  
SVVASGSENELADTMQIVSLQLNKMKS RKSCGIAVGTTIVDADKYAVTVETRLIDERAAHVNAQFR  
F

0000000000000000000000000000000000000000000000000000000000000000  
0000000000000000000000000000000000000000000000000000000000000000  
0000000000000000000000000000000000000000000000000000000000000000  
0000000000000000000000000000000000000000000000000000000000000000



EQMFTRHFFNLGGKMGDTIPDELYIKSTSVPTPGSHVYTSTPSGSMVSSEQQLFNKPYWLRRAQGH  
NNGMCWGNRVFLTVVDTTRSTNVSLCATEASDTNYKATNFKEYLRHMEEYDLQFIFQLCKITLTPE  
IMAYIHNMDPQLLEDWNFGVPPPPSASLQDTRYRYLQSQAITCQKPTPPKPTDPYASLTFWDVDLS  
ESFSMDLDQFPLGRKFLLRGAMPTVSRKRAAVSGTTPPTSKRKRVR

00000000000000000000000000000000000000000000000000000000000000000000  
00000000000000000000000000000000000000000000000000000000000000000000  
00000000000000000000000000000000000000000000000000000000000000000000  
00000000000000000000000000000000000000000000000000000000000000000000  
00000000000000000001111110000000000000000000000000000000000000000000  
00000000000000000000000000000000000000000000000000000000000000000000  
00000000000000000000000000000000000000000000000000000000000000000000  
00000000000000000000000000000000000000000000000000000000000000000000

> P00183 CPXA\_PSEPU

TTETIQSNANLAPLPPHVPEHLVDFDFMYNPSNLSAGVQEAWAVLQESNVPDLVWTRCNGGHWIAT  
RGQLIREAYEDYRHSSECFPIPREAGEAYDFIPTSMPPPEQRQFRALANQVVGMPVVDKLENRIQ  
ELACSLIESLRPQGQCNTEDYAEPFPIRIFMLLAGLPEEDI PHLKYLTDQMTRPDGSMTFAEAKE  
ALYDYLIPIIEQRRQKPGTDAISIVANGQVNGRPITSDEAKRMCGLLLVGGLD TVVNFLSFSMEFL  
AKSPEHRQELIERPERIPAACEELLRRFSLVADGRILTSDYEFHGVQLKKGQDQILLPQMLSGLDER  
ENACPMHVDFSRQKVSHTTFGHGSHLCLGQHLARREIIVTLKEWLTRIPDFS IAPGAQIQHKSGIV  
SGVQALPLVWDPATTKAV

00000011111110000000000000000000000000000000000000000000000000000000  
11111100000000000000000000000000000000000000000000000000000000000000  
00000000111111011111100000000000000000000000000000000000000000000000  
00000000000000000000000000000000000000000000000000000000000000000000  
11111100000000000000000000000000000000000000000000000000000000000000  
00000000000000000000000000000000000000000000000000000000000000000000  
111100000011111100

> P04012 VL1\_HP11

MWRPSDSTVYVPPPNPVSKVVATDAYVKRTNIFYHASSRLLAVGHPYYSIKKVNTVVPKVSQYQ  
YRVFKVVLDPDNKFALPDSSSLFDPTTQRLVWACTGLEVGGRGQPLGVGVSGHPLLNKYDDVENSQGY  
GGNPGQDNRVNVGMDYKQTQLCMVGCAPPLGEHWGKGTQCSNTSVQNGDCPPLELITSVIQDGMV  
DTGFGAMNFADLQTNKSDVPLDICGTVCKYPDYLQMAADPYGDRLFFYL RKEQMFARHFFNRAGTV  
GEPVPD DLLVKGGNNRSSVASSIYVHTPSGSLVSSEAQLFNKPYWLQKAQGHNNGICWGNHLFVTV  
VDTTRSTNMTLCASVSKSATYTNSDYKEYMRHVVEEFDLQFIFQLCSITLSAEVMAYIHTMNPSVLE  
DWNFGLSPPPNGTLEDTRYVQSQAITCQKPTPEKEKQDPYKDMSEVNLKEKFSSSELDQFPLGR  
KFLQSGYRGRTSARTGIKRPVAVSKPSTAPKRKRKTKK

00000000000000000000000000000000000000000000000000000000000000000000  
00000000000000000000000000000000000000000000000000000000000000000000





NVSEDVRDNVSVDYKQTQLCILGCAPAIGEHWAKGTACKSRPLSQGDCPPLELKNTVLEDGDMVDT  
GYGAMDFSTLQDTKCEVPLDICQSICKYPDYLQMSADPYGDSMFFCLRREQLFARHFWRAGTMGD  
TVPQSLYIKGTGMPASPGSCVYSPSPSGSIVTSDSQLFNKPYWLHKAQGHNNGVCWHNQLFVTVVD  
TTPSTNLITICASTQSPVPGQYDATKFKQYSRHEEYDLQFIFQLCTITLTADVMSYIHSMNSSILE  
DWNFGVPPPPTTSLVDTYRFVQSVAITCQKDAAPAENKDPYDKLKFWNVDLKEKFSLDLDQYPLGR  
KFLVQAGLRKPTIGPRKRSAPSATTSSKPAKRVRVRARK

0000000000000000000000000000000000000000000000000000000000000000  
0000000000000000000000000000000000000000000000000000000000000000  
0000000000000000000000000000000000000000000000000000000000000000  
0000000000000000000000000000000000000000000000000000000000000000  
0000000000000000000000000000000000000000000000000000000000000000  
000111111000000000000000000000000000000000000000000000000000000000  
0000000000000000000000000000000000000000000000000000000000000000  
0000000000000000000000000000000000000000000000000000000000000000  
0000000000000000000000000000000000000000000000000000000000000000

> P19542 OM1L\_CHLTR

MKKLLKSVLVFAALSSASSLQALPVGNPAPESLMIDGILWEGFGGDCDPCDCTTWCDALSMRMGYYG  
DFVFDRVLQTDVNKEFQMGAKPTATTGNAAAPSTCTARENPAYGRHMQDAEMFTNAAAYMALNIWDR  
FDVFCTLGATSGYLKGNASAFNLVGLFGDNENQSTVKKDAVPNMSFDQSVVELYTDTTFAWSVGAR  
AALWECGCATLGASFQYAQSKPKVEELNVLCNAAEFTINKPKGYVGKEFPLDLTAGTDAATGTKDA  
SIDYHEWQASLALSRLNMFTPYIGVKWSRASFDADTIRIAQPKLATAIFDITTLNPTIAGAGEVK  
ANAEGQLGDTMQIVSLQLNKMKSRSKSCGIAVGTIIVDADKYAVTVETRLIDERAHVNAQFRF

0000000000000000000000000000000000000000000000000000000000000000  
0000000000000000000000000000000000000000000000000000000000000000  
0000000000000000000000000000000000000000000000000000000000000000  
0000000000000000000000000000000000000000000000000000000000000000  
0000000000000000000000000000000000000000000000000000000000000000  
0000000000000000000000000000000000000000000000000000000000000000  
0000000000000000000000000000000000000000000000000000000000000000

> P77793 YDDV\_ECO57

MEMYFKRMKDEWTGLVEQADPPIRAKAAEIAVAHAHYLSIEFYRIVRIDPHAEFLSNEQVERQLK  
SAMERWIINVLSAQVDDVERLIQIQHTVAEVHARIGIPVEIVEMGFRVLKKILYPVIFSSDYSAE  
KLQVYHFSINSIDIAMEVMTRAFTFSDSSASKEDENYRIFSLLENAAEEKERQIASILSWEIDIIY  
KILLDSDLGSSSLPLSQADFGLWFNHKGRHYFSGIAEVGHISRLIQDFDGFIFNQTMRNTRNLNRS  
RVKFLQIRNTVSQIITLLRELFEEVSRHEVGMDVLTKLLNRRFLPTIFKREIAHANRTGTPLSVL  
IIDVDKFKEINDTWGHNTGDEILRKVSQAFYDNVRSSDYVFRYGGDEFIIVLTEASENETLRTAER  
IRSRVEKTKLKAANGEDIALSLSIGAAMFNHGPDYERLIQIADALYIAKRRGRNRVWLKASL

0000000000000000000000000000000000000000000000000000000000000000  
1111111111111111111111111111111111111111111111111111111111111111





QYNNETLKIKNGDLTKELNKTRQELANKQOESKENEKALNELLEKTVKDKIAKEQENKETIGTLKK  
ILDETVKDKIAKEQENKETIGTLKKILDETVKDKLAKEQKSKQNI GALKQELAKKDEANKISDASR  
KGLRRDLASREAKKQLEAEHQKLEEQNKI SEASRKGLRRDLASREAKKQLEAEQQKLEEQNKIS  
EASRKGLRRDLASREAKKQVEKALEEANSKLAALEKLNKELEESKKLTEKEKAELQAKLEAEAKA  
LKEQLAKQAEELAKLRAGKASDSQTPDTKPGNKAVPGKGQAPQAGTKPNQNKAPMKETKRQLPSTG  
ETANPFFTAALVMATAGVAAVVKRKEEN

0000000000000000000000000000000000000000000000000000000000000000  
0000000000000000000000000000000000000000000000000000000000000000  
0000000000000000000000000000000000000000000000000000000000000000  
0000000000000000000000000000000000000000000000000000000000000000  
11111111111111110000000000000001111111111111111110000000000000000  
0000000000000000000000000000000000000000000000000000000000000000  
0000000000000000000000000000000000000000000000000000000000000000  
0000000000000000000000000000000000000000000000000000000000000000

> P08342 VL2\_BPV4

MVRAARRKRASEDDLYRGCRCMGQDCPIDIKNKYEHNTLADRILKQVSSFLYFGQLGISSGKGTGGS  
TGYTPLGGRGGGGVTSGKGANVVRPTVIVDALGPTGVPIDPAVPDSSIVPLLESSGGSTTLDPG  
AEIEIIAEVHPPPVYEGPEVTIGDIEEPPILEVVPETHPTSRVRSTTSKHDNPAFTAYVASAQLPG  
ETSASDNVYILHGFNGDFVQADPEGDTIFEEI PLEEFVPMPPSTSTPTSSFRSVLNKFQRRLY  
NRKLVQQVKITNRNTFLKQPSQFVQWFEFNPAYVDDSLSLIFQQDLDEVSAAPDADFQDIVKLSRP  
VFTTKEGLVRLSRLGQRGTIKTRMACK

000000000000000000000000011111111111111111100000000000000000000000  
000000000000000000000000011111111111111111111111111111111111111111  
111111111111111111111111111111111111111111111111111111111111111111  
111111111100000000000000000000000000000000000000000000000000000000  
0000000000000000000000000000000000000000000000000000000000000000  
0000000000000000000000000000000000000000000000000000000000000000

> P23421 OM1B\_CHLTR

MKKLLKSVLVFAALSSASSLQALPVGNPAPESLMIDGILWEGFGGDPCTTWVDAISMRYGYG  
DFVFDRVLKTDVNKEFQMGAKPTTTTGNVAVPSTLTARENPAYGRHMQDAEMFTNAACMALNIWDR  
FDVFCTLGASSGYLKGNSASFNLVGLFGNENQTKVSNVAFVPMNSLDQSVVELYTDATAFAWSVGA  
RAALWECGCATLGASFQYAQSKPKVEELNVLCAAEFTINKPKGYVGKELPLDLTAGTDAATGTKD  
ASIDYHEWQASLALSRYLNMFTPYIGVKWSRASFDADTIRIAQPKSAETIFDVTTLNPTIAGAGDV  
KTS AEGQLGDTMQIVSLQLNKMKSRSKSCGIAVGTIIVDADKYAVTVETRLIDERAHVNAQFRF

0000000000000000000000000000000000000000000000000000000000000000  
000000000000000000000000011111111111100000000000000000000000000000  
000001111111111111110000000111111111111111111111111111111111111111  
0000000000000000000000000000000000000000000000000000000000000000



































SITLQQQLKELTAPDENIPAKILSYNRANRAVAAILCNHQRAPPKTFEKSMMNLQTKIDAKKEQLAD  
ARRDLKSAKADAKVMKDAKTKKVVESKKAQVQRLEEQLMKLEVQATDREENKQIALGTSKLNLYLDP  
RITVAWCKKWGVPIEKIYNKTQREKFAWAIDMADEDYEF

0000000000000000000000000000000000000000000000000000000000000000  
0000000000000000000000000000000000000000000000000000000000000000  
0000000000000000000000000000000000000000000000000000000000000000  
0000001111111111111111111111111111111111111111111111111111111111  
0000000000000000000000000000000000000000000000000000000000000000  
0000000000000000011111111111111111111111111111111111111111111111  
1111111111111111111111111111111111111111111111111111111111111111  
0000000000000000000000000000000000000000000000000000000000000000  
1111111111111111111111111111111111111111111111111111111111111111  
0000000000000000000000000000000000000000000000000000000000000000  
0000000000000000000000000000000000000000000000000000000000000000  
0000000000000000000000000000000000000000000000000000000000000000  
0000000000000000000000000000000000000000000000000000000000000000

> P43238 ALL12\_ARAHY

MRGRVSPMLLLLGILVLASVSATHAKSSPYQKKTENPCAQRCLQSCQQEPDDLKQKACESRCKLE  
YDPRCVYDPRGHTGTTNQRSPPGERTRGRQPGDYDDDRRQPRREEGGRWGPAGPREREREEDWRQP  
REDWRRPUSHQQPRKIRPEGREGEQEWGTPGSHVREETSRRNPFYFPSRRFSTRYGNQNGRIRVLQR  
FDQRSRQFQNLQNHRIVQIEAKPNTLVLPKHADADNILVIQQGQATVTVANGNNRKSFNLDEGHAL  
RIPSGFISYILNRHDNQLNRVAKISMPVNTPGQFEDFFPASSRDQSSYLQGFSTRNTLEAAFNAEFN  
EIRRVLLEENAGGEQEERGQRRWSTRSSENNEGVIVKVSKEHVEELTKHAKSVSKKGSEEEGDITN  
PINLREGEPPDLNNGFKLFEVKPKKPNQLQDLDMMLTCVEIKEGALMLPHFNSKAMVIVVVKGT  
GNLELVAVRKEQQQRGRREEEDEDEEEEGSNREVRRYTARLKEGDVFIMPAAHPVAINASSELHL  
LGFGINAENNHRIFLAGDKDNVIDQIEKQAKDLAFPGSGEQVEKLIKQKESHFVSARPQSQSQSP  
SSPEKESPEKEDQEEENQGGKGPLLSILKAFN

00000000000000000000000001111111111111111111111111111111111111111111  
00000000000000000000000001111111111111111111111111111111111111111111  
1111111111111111111111111111111111111111111111111111111111111111  
0000000000000000000000000000000000000000000000000000000000000000  
00000000000000000000000001111111111111111111111111111111111111111111  
1111111111111111111111111111111111111111111111111111111111111111  
1111111111111111111111111111111111111111111111111111111111111111  
1111111111111111111111111111111111111111111111111111111111111111  
1111111111111111111111111111111111111111111111111111111111111111  
1111111111111111111111111111111111111111111111111111111111111111  
0111111111111111111111111111111111111111111111111111111111111111

> P02458 CO2A1\_HUMAN

MIRLGAPQSLVLLTLLVAAVLRCQGQDVRQPGPKGQKGEPPGDIKDIVGPKGPPGPGQGPAGEQGPRG































PGPPGPAGEKGS PGADGPAGAPGTPGPQGIAGQRGVVGLPGQRGERGF PGLPGPSGEPGKQGPSGA  
S GERGPPGPMGPPGLAGPPGESGREGAPGAEGSPGRDGS PGAKGDRGETGPAGPPGAPGAPGAPG  
VGPAGKSGDRGETGPAGPAGVPVGPAGARGPAGPQGPRGDKGETGEQGDRGIKGRGFSGLQGPPGP  
PGSPGEQGPS GASGPAGPRGPPGSAGAPGKDG LNLPGPIGPPGPRGRTGDAGPVGPPGPPGPPGP  
PGPPSAGFDFSLPQPPQEKAHDGGRYRADDANVVRDRDLEVDTTLKSLSQQIENIRSPEGSRKN  
PARTCRDLKMCHSDWKS GEYWIDPNQGCNLDAIKVFCN METGETCVYPTQPSVAQKNWYISKNP KD  
KRHVWFGESMTDGFQFEYGGQGS DPADVAIQ LTFRLMSTEASQNITYHCKNSVAYMDQQTGNLKK  
ALLLKSNEIEIRAEGNSRFTYSVTVDGCTSHTGAWGKT VIEYKTTKTSRLPIIDVAPLDV GADQ  
EFGFDVGPVCF L

00000000000000000000000000000000000000000000000000000000000000000000  
00000000000000000000000000000000000000000000000000000000000000000000  
00000000000000000000000000000000000000000000000000000000000000000000  
00000000000000000000000000000000000000000000000000000000000000000000  
00000000000000000000000000000000000000000000000000000000000000000000  
00000000000000000000000000000000000000000000000000000000000000000000  
0000000011111111111000000000000000000000000000000000000000000000000000  
00000000000000000000000000000000000000000000000000000000000000000000  
00000000000000000000000000000000000000000000000000000000000000000000  
00000000000000000000000000000000000000000000000000000000000000000000  
00000000000000000000000000000000000000000000000000000000000000000000  
00000000000000000000000000000000000000000000000000000000000000000000  
00000000000000000000000000000000000000000000000000000000000000000000  
00000000000000000000000000000000000000000000000000000000000000000000  
00000000000000000000000000000000000000000000000000000000000000000000  
00000000000000000000000000000000000000000000000000000000000000000000  
00000000000000000000000000000000000000000000000000000000000000000000  
00000000000000000000000000000000000000000000000000000000000000000000  
00000000000000000000000000000000000000000000000000000000000000000000  
00000000000000000000000000000000000000000000000000000000000000000000  
00000000000000000000000000000000000000000000000000000000000000000000  
00000000000000000000000000000000000000000000000000000000000000000000  
000000000000

> P32553 VP2\_AHSV4

MASEFGILMTNEKFDPSLEKTICDVIVTKKGRVKHKEVDGVCGYEWDETNRH RFG LCEVEHDMSISE  
FMYNEIRCEGAYPIFPRYIIDTLKYEFIDRNDHQIRVDRDDNEMRKILIQPYAGEMYFSPECYPS  
VFLRREARSQKLDRIRNYIGKRVEFYEEESKRKAILDQNKMSKVEQWRDAVNERIVSIEPKRGECY  
DHGTDIIYQFIKKLRF GMMYPHYVVLHSDYCVPNKGGTSIGSWHIRKRTEGD AKASAMYS GKGPL  
NDLRVKIERDDL SRETIIQII EYGKKFNSSAGDKQGNISIEKLVEYCDFLTTFVHAKKKEEGEDDT
