# Supplementary material for: Prediction of B-cell epitopes using evolutionary information and propensity scales
Source: PubMed Central journal article supplement (PMC3549808; doi:10.1186/1471-2105-14-s2-s10), 2013-01-21
Supplement: 1471-2105-14-S2-S10-S5.pdf [file 1471-2105-14-S2-S10-S5.pdf]

>158 TMV sp|P03570|COAT\_TMV Coat protein - Tobacco mosaic virus (vulgare) (TMV), Tobacco mosaic virus (strain B935A) (TMV), and Tobacco mosaic virus (strain Korean NC 82) (TMV).

SYSITTPSQFVFLSSAWADPIELINLCTNALGNQFQTQQARTVVQRQFSEVWKPSPQVTVRFPDSD  
FKVYRYNAVLDPDPLVTALLGAFDTRNRIIEVENQANPTTAETLDATTRVDDATVAIRSAINNLIVEL  
IRGTGSYNRSSFESSGLVWTSGPAT  
11111111110000000011111111111111011111100000000000000111111111111  
110000000111111111111100000000000001111111111000000000000000000  
01111111111111001111111111
